# Supplementary material for: Service Users’ and Providers’ Experiences and Perceptions of Mental Health Accommodation Services: A Rapid Qualitative Synthesis of International Evidence
Source: Hindawi journal article supplement (doi:10.1155/2024/7971386), 2024-01-01
Supplement: f1 [file 7971386.f1.docx]

**Additional file 2- Search terms and strategy**

| **#No** | **PubMed, PsycINFO and google scholar** |
| --- | --- |
| **#1** | “Serious mental illness” OR “Severe mental illness” OR “Serious mental disorders” OR “Psychiatric disorders” OR “Manic Depression” OR “Severe depression” OR “major depression” OR “schizophrenia” OR “schizoaffective disorder” OR “manic depressive disorder” OR “panic disorder” OR “obsessive compulsive disorder” OR “Anxiety Disorders” OR “Panic Disorder” OR “Phobic Disorder” OR “Eating Disorders” OR “Anorexia Nervosa” OR “Bulimia Nervosa” OR “Mood Disorders” OR “Affective Disorders” OR Psychotic OR “Bipolar Disorder” OR “Depressive Disorder” OR “Depressive Disorder” OR “Major OR Personality Disorders” OR “Antisocial Personality Disorder” OR “Borderline Personality Disorder” OR “Compulsive Personality Disorder” OR “Dependent Personality Disorder” OR “Histrionic Personality Disorder” OR “Paranoid Personality Disorder” OR “Passive-Aggressive Personality Disorder” OR “Schizoid Personality Disorder” OR “Schizotypal Personality Disorder” OR “Paranoid Disorders” OR “Psychotic Disorders” OR Schizophrenia OR Schizophrenia OR Catatonic OR Schizophrenia OR Disorganized OR Schizophrenia Paranoid OR "bipolar and related disorders" OR "schizoaffective psychosis" OR "schizophren*" OR "schizoaffective*" OR “Post-traumatic stress disorder” OR “stress disorder, post-traumatic” OR “Neuroses, post traumatic” OR “Post-traumatic neuroses” OR PTSD OR “Posttraumatic Neuroses” OR “Post traumatic stress disorder” OR “stress disorder post traumatic” OR “Delayed stress disorder” OR “Chronic post-traumatic stress  disorder” OR “Chronic post-traumatic stress disorder” |
| **#2** | "Residential care" OR "residential facility*" OR "residential care center*" OR “hous* first” OR “treat* first” OR “Housing first model” OR “Housing first program” OR "Rehabilitation center*" OR "community-based rehabilitation" OR "Community-based rehabilitation center*" OR "rehabilitation facility*" OR "rehabilitation care" OR "independent living facility*" OR "group home*" OR "assisted living facility*" OR "halfway hous*" OR "halfway house*" OR "long-term care facility*" OR "supported hous*" OR "supported housing" OR "supported accommodation" OR "floating outreach" OR "floating support" OR “floating visit*” OR "supported accommodation" OR "outreach services" OR “Assertive community treatment” OR “ACT team*” |
| **#3** | "qualitative" OR "qualitative research" OR "interviews" OR "focus groups" OR [title and abstract OR experience* OR perception* OR view* OR “service user*’ experience*” OR “service users’ perceptions” OR “service providers’ experiences” OR “service providers’ perceptions” |
| **#4** | Afghanistan OR “Guinea-Bissau” OR “Sierra Leone” OR “Burkina Faso” OR Haiti OR Somalia OR Burundi OR Korea OR “South Sudan” OR “Central African Republic Liberia” OR Sudan OR Chad OR Madagascar OR “The Syrian Arab Republic” OR Congo OR Malawi OR Tajikistan OR Eritrea OR Mali OR Togo OR Ethiopia OR Mozambique OR Uganda OR Gambia OR Niger OR Yemen OR Guinea OR Rwanda OR Albania OR Fiji OR Montenegro OR “American Samoa” OR Gabon OR Namibia OR Argentina OR Georgia OR “North Macedonia” OR Armenia OR Grenada OR Paraguay OR Azerbaijan OR Guatemala OR Peru OR Belarus OR Guyana OR “Russian Federation” OR Belize OR Indonesia OR Samoa OR Bosnia OR Iran OR Serbia OR Botswana OR Iraq OR “South Africa” OR Brazil OR Jamaica OR “St Lucia” OR Bulgaria OR Jordan OR “St. Vincent” OR China OR Kazakhstan OR Suriname OR Colombia OR Kosovo OR Thailand OR “Costa Rica” OR Lebanon OR Tonga OR CUBA OR Libya OR Turkey OR Dominica OR Malaysia OR Turkmenistan OR “Dominican Republic” OR Maldives OR Tuvalu OR “Equatorial Guinea” OR “Marshall Islands” OR Venezuela OR Ecuador OR Mexico |
| **#5** | **#1&#2#3 Filters title and abstract, English 1990-2023** |
| **#6** | **#1&#2&#3- Filters full-text, English 1990-2023** |
| **#7** | **#1&#2&#3&#4- Filters title and abstract, English 1990-2021** |
| **#8** | **#1&#2&#3&#4- Filters full-text, English 1990-2021** |
